# Supplementary material for: Prenatal Lipopolysaccharide Exposure Alters Hepatic Drug-Metabolizing Enzyme Expression in Mouse Offspring via Histone Modifications
Source: MDPI journal article supplement (doi:10.3390/toxics11010082), 2023-01-15
Supplement: s1 [file s1]

**Supplemental Table S1.** Primers for RT-qPCR

| Gene           |         | Sequence 5'-3'           | Gene ID | Position  |
|----------------|---------|--------------------------|---------|-----------|
| <i>NF-κB</i>   | Forward | ATGGCAGACGA TGA TCCCTAC  | NM0086  | 503-613   |
|                | Reverse | TGTTGACAGTGGTATTTCTGGTG  | 89.2    |           |
| <i>IL-6</i>    | Forward | TAGTCCTTCCTACCCCAATTTCC  | NM0311  | 566-641   |
|                | Reverse | TTGGTCCTTAGCCACTCCTTC    | 68.2    |           |
| <i>TNF-α</i>   | Forward | CCCTCACACTCAGATCATCTTCT  | NM0136  | 397-457   |
|                | Reverse | GCTACGACGTGGGCTACAG      | 93.3    |           |
| <i>Pxr</i>     | Forward | CCCATCAACGAGAGGAGGA      | NM0109  | 408-524   |
|                | Reverse | TCTGAAAAACCCCTTGCATC     | 36.3    |           |
| <i>Car</i>     | Forward | GCCTAAGAGAAACAGGAGACCAT  | NM0012  | 504-579   |
|                | Reverse | CTCCCAGCAAACGGACAGAT     | 43062.1 |           |
| <i>Ahr</i>     | Forward | ACA TACGCCGGTAGGAAGAGA   | NM0013  | 603-1343  |
|                | Reverse | GGTCCAGCTCTGTA TTGAGGC   | 14027.1 |           |
| <i>Cyp3a11</i> | Forward | ACAAACAAGCAGGGA TGGAC    | NM0078  | 65-148    |
|                | Reverse | GGTAGAGGAGCACCAAGCTG     | 18.3    |           |
| <i>Cyp1a2</i>  | Forward | GACA TGGCCTAACGTGCAG     | NM0099  | 1005-1137 |
|                | Reverse | GGTCAGAAAGCCGTGGTTG      | 93.3    |           |
| <i>Cyp2b10</i> | Forward | AAGGAGAAGTCCAACCAGCA     | NM0099  | 847-993   |
|                | Reverse | CTCTGCAACA TGGGGGTACT    | 99.4    |           |
| <i>Ugt1a1</i>  | Forward | GTCA TCCAAAGACTCGGGCA    | NM2016  | 1134-1294 |
|                | Reverse | GACA TTCAGGGTCAACCCAG    | 45.2    |           |
| <i>Sult1e1</i> | Forward | ATGGAGACTTCTA TGCCTGAGT  | NM0231  | 153-284   |
|                | Reverse | ACACAACCTCACTAA TCCAGGTG | 35.2    |           |
| <i>Gapdh</i>   | Forward | AGGTCGGTGTGAACGGA TTTG   | NM0012  | 100-222   |
|                | Reverse | TGTAGACCATGTAGTTGAGGTCA  | 89726.1 |           |

**Supplemental Table S2.** Primer Sequences for ChIP-qPCR

| Primer   | Sequence (5'-3')          |
|----------|---------------------------|
| Primer 1 | F: CCTGCTTCTACTGTCTGAGTGT |
|          | R: TCAAGCCAGTAGATGGATCACC |
| Primer 2 | F: TGGTCTCTTGGATCCTGGTTTC |
|          | R: GCACCACATACCCACCAAGA   |

F, forward primer; R, reverse prim
